# Supplementary material
Source: publisher site journal article supplement (https://www.dovepress.com/article/549239)

Supplementary Table S1. Full database-specific search strategies

| 1. Search Strategy (example for PubMed)   | ("cervicogenic headache" OR "CEH") AND  ("minimally invasive" OR "radiofrequency" OR "nerve block" OR "pulsed radiofrequency" OR "RFA" OR "PRF" OR "injection") AND  ("clinical outcomes" OR "treatment" OR "therapy") | | --- |   **Filters applied:**   - Humans - English language - Clinical trials, cohort studies, case-control studies, and anatomical studies   2. Search Strategy (example for Embase)   | ('cervicogenic headache'/exp OR 'cervicogenic headache' OR 'CEH') AND  ('minimally invasive procedure'/exp OR 'minimally invasive' OR 'radiofrequency'/exp OR 'radiofrequency' OR  'nerve block'/exp OR 'nerve block' OR 'pulsed radiofrequency'/exp OR 'PRF' OR 'RFA' OR 'injection'/exp OR 'injection') AND  ('treatment outcome'/exp OR 'clinical outcome' OR 'therapy'/exp OR 'treatment') | | --- |   **Filters applied:**   - Humans - English language - Study types: clinical trial, cohort study, case-control study, anatomical study   3. Search Strategy (example for Cochrane Library)   | ("cervicogenic headache" OR "CEH") AND  ("minimally invasive" OR "radiofrequency" OR "nerve block" OR "pulsed radiofrequency" OR "RFA" OR "PRF" OR "injection") AND  ("clinical outcomes" OR "treatment" OR "therapy") | | --- |   **Filters applied:**   - Humans - English language - Trials only (Cochrane CENTRAL)   4. Search Strategy (example for Web of Science)   | TS = (("cervicogenic headache" OR "CEH") AND  ("minimally invasive" OR "radiofrequency" OR "nerve block" OR "pulsed radiofrequency" OR "RFA" OR "PRF" OR "injection") AND  ("clinical outcomes" OR "treatment" OR "therapy")) | | --- |   **Filters applied:**   - Document types: Article - Language: English - Research areas: Clinical Neurology, Neurosciences, Anesthesiology, Radiology, or Anatomy |
| --- | --- | --- | --- | --- |

Supplementary Table S2. PRISMA 2020 Checklist

| ****Section / Topic**** | ****Item No.**** | ****Checklist Item**** | ****Reported on Page No.**** |
| --- | --- | --- | --- |
| **TITLE** | 1 | Identify the report as a systematic review. | 1 |
| **ABSTRACT** | 2 | Provide a structured summary including background, objectives, data sources, eligibility criteria, study appraisal, synthesis methods, results, limitations, conclusions, and registration number. | 1 |
| **INTRODUCTION** | 3 | Describe the rationale for the review in the context of what is already known. | 3 |
|  | 4 | Provide an explicit statement of the objectives or questions being addressed. | 3 |
| **METHODS** | 5 | Indicate whether a review protocol exists and where it can be accessed (e.g., PROSPERO registration number). | 4 |
|  | 6 | Specify eligibility criteria. | 4-5 |
|  | 7 | Describe all information sources (e.g., databases, registers). | 5 |
|  | 8 | Present full search strategy for at least one database. | Supplementary File S2 |
|  | 9 | State the process for selecting studies. | 5-6 |
|  | 10 | Describe data collection process and data items extracted. | 6 |
|  | 11 | List and define all outcomes for which data were sought. | 6-7 |
|  | 12 | Describe methods used to assess risk of bias in included studies. | 7 |
|  | 13 | State methods for synthesizing results and summary measures used. | 7-8 |
| **RESULTS** | 14 | Provide numbers of studies screened, assessed, and included, with reasons for exclusions (PRISMA flow chart). | 8-9 (Figure 1) |
|  | 15 | Present characteristics of included studies. | 9–10 (Tables 1–2) |
|  | 16 | Present risk of bias assessment for each study. | 10-11 (Table 3, Figure 3) |
|  | 17 | Present results of individual studies and syntheses. | 11-18 |
| **DISCUSSION** | 18 | Summarize the main findings, strengths, and limitations of the evidence. | 18-21 |
|  | 19 | Discuss limitations of the review process. | 21 |
|  | 20 | Provide a general interpretation of the results and implications for practice, policy, or research. | 21-22 |
| **OTHER INFORMATION** | 21 | Registration and protocol (e.g., PROSPERO CRD420251183639). | 4, 22 |
|  | 22 | Support/funding sources. | 22 |
|  | 23 | Competing interests. | 22 |

Supplementary Figure 1. Risk_Of_Bias_Summary


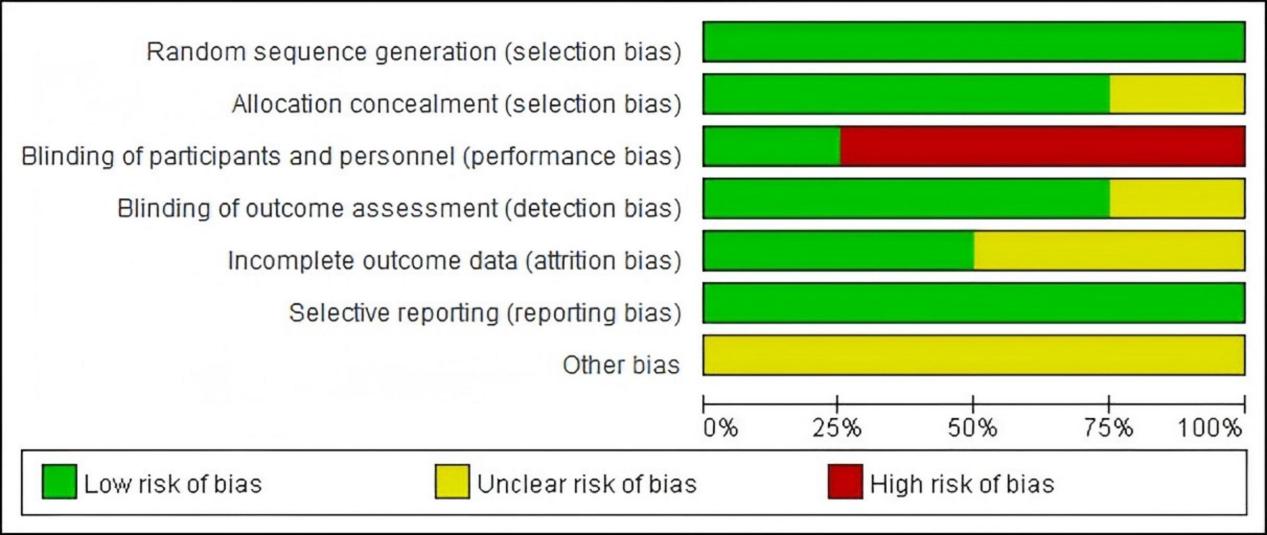

Supplement: Supplementary file 1 [file 549239_Supplementary%20Materials.docx]
